# Supplementary material for: Effectiveness of SMILE Combined with Micro-Monovision in Presbyopic Patients: A Pilot Study
Source: MDPI journal article supplement (doi:10.3390/life13030838), 2023-03-20
Supplement: s1 [file s1]

**Table S1.** Preoperative and postoperative results for the patients from Center A.

|                                    | Case A1 (Micro 0.5 D)<br>(Women / 45 years old) |            | Case A2 (Micro 0.5 D)<br>(Men / 42 years old) |            | Case A3 (Micro 1.0 D)<br>(Men / 45 years old) |            |
|------------------------------------|-------------------------------------------------|------------|-----------------------------------------------|------------|-----------------------------------------------|------------|
|                                    | Preop.                                          | 6-month    | Preop.                                        | 6-month    | Preop.                                        | 6-month    |
| <b>Right Eye Sphere (D)</b>        | -2,50                                           | -0,25      | -3,25                                         | 0          | -3,50                                         | -1         |
| <b>Astigmatism (D)</b>             | (-0,25)40                                       | (-0,25)10  | (-0,50)90                                     |            | (-0,50)55                                     |            |
| <b>Left Eye Sphere (D)</b>         | -2,50                                           | -0,25      | -3,50                                         | -0,50      | -3,50                                         | 0          |
| <b>Astigmatism (D)</b>             | (-0,50)140                                      | (-0,25)135 | (-0,75)85                                     |            | (-0,50)160                                    |            |
| <b>Right Eye SE (D)</b>            | -2,625                                          | -0,375     | -3,5                                          | 0          | -3,75                                         | -1         |
| <b>Left Eye SE (D)</b>             | -2,75                                           | -0,375     | -3,875                                        | -0,50      | -3,75                                         | 0          |
| <b>Binocular Efficacy</b>          |                                                 |            |                                               |            |                                               |            |
| <b>Far VA (logMAR)</b>             | 0                                               | -0.1       | -0,2                                          | -0,3       | -0,2                                          | 0,1        |
| <b>Interm. VA (logMAR)</b>         | 0                                               | -0.1       | 0                                             | -0,3       | 0                                             | 0          |
| <b>Near VA (logMAR)</b>            | 0                                               | 0          | -0,2                                          | -0,3       | -0,2                                          | 0,1        |
| <b>Stereopsis</b>                  |                                                 |            |                                               |            |                                               |            |
| <b>Far (arcsec)</b>                | 397                                             | 159        | 79                                            | 119        | 40                                            | 79         |
| <b>Intermediate (arcsec)</b>       | 119                                             | 40         | 119                                           | 40         | 40                                            | 40         |
| <b>Near (arcsec)</b>               | 119                                             | 40         | 79                                            | 79         | 40                                            | 40         |
| <b>CISS Score</b>                  | 36                                              | 24         | 29                                            | 10         | 5                                             | 4          |
| <b>Driving Score (logit score)</b> | -0.41                                           | -1.20      | -3.10                                         | 0.59       | -4.87                                         | -7.72      |
| <b>Single questions</b>            |                                                 |            |                                               |            |                                               |            |
| <b>Total Spectacle Ind.</b>        |                                                 |            |                                               |            |                                               |            |
| <b>Far</b>                         | No                                              | Yes        | No                                            | Yes        | No                                            | Yes        |
| <b>Intermediate</b>                | Yes                                             | Yes        | No                                            | Yes        | No                                            | Yes        |
| <b>Near</b>                        | Yes                                             | Yes        | Yes                                           | Yes        | Yes                                           | Yes        |
| <b>Satisfaction</b>                |                                                 |            |                                               |            |                                               |            |
| <b>Far</b>                         | Not at all                                      | Satisfied  | Not at all                                    | Neutral    | Not at all                                    | Very       |
| <b>Intermediate</b>                | Slightly                                        | Satisfied  | Not at all                                    | Very       | Not at all                                    | Very       |
| <b>Near</b>                        | Very                                            | Satisfied  | Neutral                                       | Slightly   | Very                                          | Very       |
| <b>Dysphotopsia (Bothersome)</b>   | Slightly                                        | Very       | Moderately                                    | Moderately | Not at all                                    | Not at all |
| <b>Submitted again (Likely)</b>    | -                                               | Likely     | -                                             | Likely     | -                                             | Very       |
