# Supplementary material for: Effectiveness of SMILE Combined with Micro-Monovision in Presbyopic Patients: A Pilot Study
Source: MDPI journal article supplement (doi:10.3390/life13030838), 2023-03-20
Supplement: s1 [file s1]

**Table S2.** Preoperative and postoperative results for the patients from Center B.

|                                    | Case B.1 (Micro 1.0 D)<br>(Women/51 years old) |            | Case B.2 (Micro 0.75 D)<br>(Men/48 years old) |            | Case B.3 (Micro 1.0 D)<br>(Men / 42 years old) |            |
|------------------------------------|------------------------------------------------|------------|-----------------------------------------------|------------|------------------------------------------------|------------|
|                                    | Preop.                                         | 6-month    | Preop.                                        | 6-month    | Preop.                                         | 6-month    |
| <b>Right Eye Sphere (D)</b>        | -3,75                                          | -1,25      | -1                                            | 0          | -1,5                                           | -0.25      |
| <b>Astigmatism (D)</b>             | (-1,50)170                                     | (-0,50)180 | (-0,50)180                                    | (-0,50)180 | (-1,25)90                                      | 0          |
| <b>Left Eye Sphere (D)</b>         | -3,75                                          | -0,25      | -1                                            | -0,75      | -1,50                                          | -1.25      |
| <b>Astigmatism (D)</b>             | (-1,50)180                                     | (-0,50)10  | (-0,50)120                                    | (-0,50)120 | (-1,25)75                                      | 0          |
| <b>Right Eye SE (D)</b>            | -2,625                                         | -1,5       | -0,75                                         | -0,25      | -1,375                                         | -0.25      |
| <b>Left Eye SE (D)</b>             | -2,625                                         | -0,5       | -0,75                                         | -1         | -1,375                                         | -1.25      |
| <b>Binocular Efficacy</b>          |                                                |            |                                               |            |                                                |            |
| <b>Far VA (logMAR)</b>             | 0                                              | 0          | -0,1                                          | 0          | -0,1                                           | 0          |
| <b>Interm. VA (logMAR)</b>         | 0                                              | 0          | -0,1                                          | -0.1       | 0                                              | -0.1       |
| <b>Near VA (logMAR)</b>            | 0                                              | 0          | -0,1                                          | -0.1       | -0,1                                           | -0.1       |
| <b>Stereopsis</b>                  |                                                |            |                                               |            |                                                |            |
| <b>Far (arcsec)</b>                | 159                                            | 119        | 40                                            | 119        | 79                                             | 119        |
| <b>Intermediate (arcsec)</b>       | 79                                             | 79         | 40                                            | 40         | 40                                             | 40         |
| <b>Near (arcsec)</b>               | 79                                             | 79         | 79                                            | 79         | 40                                             | 40         |
| <b>CISS Score</b>                  | 0                                              | 2          | 0                                             | 0          | 3                                              | 2          |
| <b>Driving Score (logit score)</b> | -4.87                                          | -7.72      | -3.10                                         | -2.40      | -0.67                                          | -5.49      |
| <b>Single questions</b>            |                                                |            |                                               |            |                                                |            |
| <b>Total Spectacle Ind.</b>        |                                                |            |                                               |            |                                                |            |
| <b>Far</b>                         | Yes                                            | Yes        | Yes                                           | No         | No                                             | Yes        |
| <b>Intermediate</b>                | Yes                                            | Yes        | No                                            | Yes        | No                                             | Yes        |
| <b>Near</b>                        | No                                             | Yes        | No                                            | Yes        | Yes                                            | Yes        |
| <b>Satisfaction</b>                |                                                |            |                                               |            |                                                |            |
| <b>Far</b>                         | Not at all                                     | Very       | Not at all                                    | Neutral    | Not at all                                     | Satisfied  |
| <b>Intermediate</b>                | Not at all                                     | Very       | Slightly                                      | Very       | Not at all                                     | Very       |
| <b>Near</b>                        | Satisfied                                      | Very       | Satisfied                                     | Very       | Satisfied                                      | Satisfied  |
| <b>Dysphotopsia (Bothersome)</b>   | Not at all                                     | Slightly   | Slightly                                      | Slightly   | Very                                           | Not at all |
| <b>Submitted again (Likely)</b>    | -                                              | Very       | -                                             | Likely     | -                                              | Very       |
